# Supplementary material for: Cyclization–endoperoxidation cascade reactions of dienes mediated by a pyrylium photoredox catalyst
Source: publisher site journal article supplement (doi:10.3762/bjoc.10.128), 2014-06-03
Supplement: Additional file 2 [file 1860-5397-10-128-S2.pdf]

# **Supporting Information File 2**

**for**

## **Cyclization–endoperoxidation cascade reactions of dienes mediated by a pyrylium photoredox catalyst**

Nathan J. Gesmundo and David A. Nicewicz\*

Address: Department of Chemistry, University of North Carolina at Chapel Hill,  
Chapel Hill, NC 27599-3290, USA

Email: David A. Nicewicz - [nicewicz@unc.edu](mailto:nicewicz@unc.edu)

\*Corresponding author

**X-ray data**

## 3a

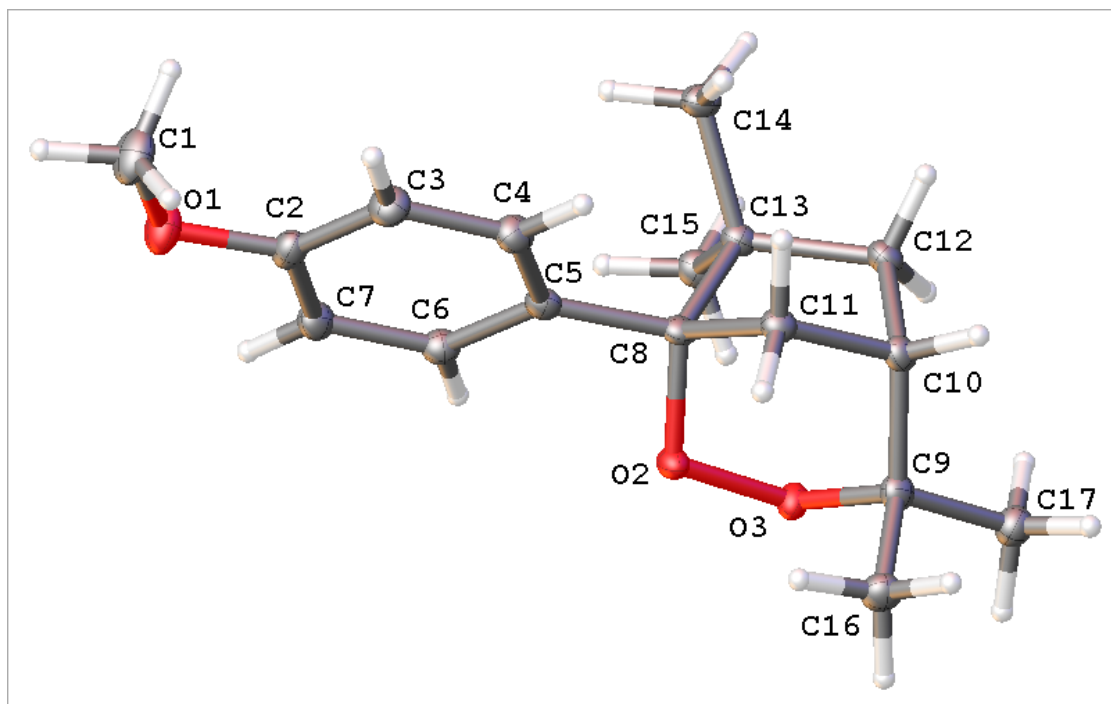

**Table 1 Crystal data and structure refinement for x1402007.**

|                                       |                                                |
|---------------------------------------|------------------------------------------------|
| Identification code                   | x1402007                                       |
| Empirical formula                     | C <sub>17</sub> H <sub>24</sub> O <sub>3</sub> |
| Formula weight                        | 276.36                                         |
| Temperature/K                         | 100                                            |
| Crystal system                        | monoclinic                                     |
| Space group                           | P2 <sub>1</sub> /c                             |
| a/Å                                   | 11.4559(2)                                     |
| b/Å                                   | 5.90270(10)                                    |
| c/Å                                   | 22.2867(4)                                     |
| α/°                                   | 90                                             |
| β/°                                   | 102.5127(10)                                   |
| γ/°                                   | 90                                             |
| Volume/Å <sup>3</sup>                 | 1471.25(4)                                     |
| Z                                     | 4                                              |
| ρ <sub>calc</sub> /mg/mm <sup>3</sup> | 1.248                                          |
| m/mm <sup>-1</sup>                    | 0.668                                          |
| F(000)                                | 600.0                                          |
| Crystal size/mm <sup>3</sup>          | 0.225 × 0.141 × 0.054                          |
| Radiation                             | CuKα (λ = 1.54178)                             |
| 2θ range for data collection          | 7.904 to 140.106°                              |
| Index ranges                          | -13 ≤ h ≤ 13, -6 ≤ k ≤ 7, -27 ≤ l ≤ 27         |
| Reflections collected                 | 15784                                          |

Independent reflections      2786 [ $R_{\text{int}} = 0.0285$ ,  $R_{\text{sigma}} = 0.0191$ ]  
Data/restraints/parameters    2786/0/186  
Goodness-of-fit on  $F^2$         1.033  
Final R indexes [ $I \geq 2\sigma(I)$ ]     $R_1 = 0.0351$ ,  $wR_2 = 0.0852$   
Final R indexes [all data]       $R_1 = 0.0407$ ,  $wR_2 = 0.0891$   
Largest diff. peak/hole /  $e \text{ \AA}^{-3}$  0.27/-0.20

**Table 2 Fractional Atomic Coordinates ( $\times 10^4$ ) and Equivalent Isotropic Displacement Parameters ( $\text{\AA}^2 \times 10^3$ ) for x1402007.  $U_{\text{eq}}$  is defined as 1/3 of of the trace of the orthogonalised  $U_{\text{IJ}}$  tensor.**

| Atom | x           | y          | z         | U(eq)     |
|------|-------------|------------|-----------|-----------|
| O1   | 3117.4(8)   | 8879.9(16) | 6855.4(4) | 23.6(2)   |
| O2   | 7848.5(7)   | 5821.0(13) | 6216.7(4) | 15.08(19) |
| O3   | 8854.8(7)   | 5164.9(14) | 5935.0(4) | 15.6(2)   |
| C1   | 2864.7(12)  | 10817(3)   | 7189.2(7) | 28.3(3)   |
| C2   | 4205.2(11)  | 8838(2)    | 6693.1(6) | 17.8(3)   |
| C3   | 5062.0(11)  | 10532(2)   | 6829.9(6) | 19.4(3)   |
| C4   | 6138.3(11)  | 10300(2)   | 6643.4(6) | 18.3(3)   |
| C5   | 6382.2(11)  | 8417(2)    | 6314.1(5) | 15.1(3)   |
| C6   | 5503.5(11)  | 6723(2)    | 6180.1(5) | 16.5(3)   |
| C7   | 4434.4(11)  | 6923(2)    | 6368.5(6) | 17.9(3)   |
| C8   | 7541.9(11)  | 8217.7(19) | 6101.8(5) | 13.8(3)   |
| C9   | 9901.2(11)  | 6488(2)    | 6207.9(6) | 16.2(3)   |
| C10  | 9548.4(11)  | 8993(2)    | 6099.3(5) | 15.6(3)   |
| C11  | 8595.4(11)  | 9608(2)    | 6458.8(5) | 15.3(3)   |
| C12  | 8849.3(11)  | 9402(2)    | 5430.0(5) | 16.4(3)   |
| C13  | 7506.1(11)  | 8919(2)    | 5420.1(5) | 14.9(3)   |
| C14  | 6773.2(11)  | 11104(2)   | 5270.7(6) | 18.0(3)   |
| C15  | 6954.5(11)  | 7131(2)    | 4945.4(5) | 17.6(3)   |
| C16  | 10339.6(12) | 5845(2)    | 6882.7(6) | 20.4(3)   |
| C17  | 10825.2(11) | 5739(2)    | 5848.6(6) | 20.0(3)   |

**Table 3 Anisotropic Displacement Parameters ( $\text{\AA}^2 \times 10^3$ ) for x1402007. The Anisotropic displacement factor exponent takes the form: -  $2\pi^2 [h^2 a^{*2} U_{11} + 2hka^* b^* U_{12} + \dots]$ .**

| Atom | $U_{11}$ | $U_{22}$ | $U_{33}$ | $U_{23}$ | $U_{13}$ | $U_{12}$ |
|------|----------|----------|----------|----------|----------|----------|
| O1   | 17.9(5)  | 27.6(5)  | 27.2(5)  | -8.3(4)  | 9.1(4)   | -1.2(4)  |
| O2   | 16.0(4)  | 11.9(4)  | 19.1(4)  | 1.6(3)   | 7.7(3)   | 1.3(3)   |
| O3   | 13.1(4)  | 14.2(4)  | 20.4(4)  | -2.0(3)  | 6.0(3)   | 0.0(3)   |
| C1   | 22.0(7)  | 32.8(8)  | 32.4(8)  | -10.6(6) | 11.4(6)  | 1.2(6)   |
| C2   | 15.2(6)  | 22.2(6)  | 16.3(6)  | 1.5(5)   | 3.8(5)   | 2.0(5)   |
| C3   | 21.8(7)  | 17.5(6)  | 19.7(6)  | -3.8(5)  | 6.0(5)   | 1.7(5)   |
| C4   | 18.7(6)  | 15.6(6)  | 20.1(6)  | -1.6(5)  | 3.2(5)   | -2.2(5)  |
| C5   | 17.0(6)  | 14.4(6)  | 13.6(6)  | 2.0(4)   | 2.4(5)   | 0.4(5)   |
| C6   | 18.0(6)  | 14.4(6)  | 16.8(6)  | -1.1(5)  | 3.2(5)   | 0.6(5)   |
| C7   | 16.3(6)  | 17.4(6)  | 19.0(6)  | -0.6(5)  | 1.6(5)   | -2.7(5)  |
| C8   | 16.2(6)  | 9.2(5)   | 16.0(6)  | 0.3(4)   | 3.2(5)   | -0.2(4)  |
| C9   | 14.4(6)  | 16.3(6)  | 17.4(6)  | -0.3(5)  | 2.1(5)   | -2.1(5)  |
| C10  | 14.7(6)  | 15.1(6)  | 17.0(6)  | 0.5(4)   | 3.3(5)   | -2.4(4)  |
| C11  | 16.6(6)  | 12.6(6)  | 16.3(6)  | -0.9(4)  | 3.0(5)   | -1.0(4)  |
| C12  | 18.3(6)  | 14.3(6)  | 17.1(6)  | 1.8(5)   | 5.0(5)   | -1.5(5)  |
| C13  | 16.7(6)  | 13.3(6)  | 14.5(6)  | 0.8(4)   | 3.2(5)   | -0.7(4)  |
| C14  | 19.2(6)  | 14.2(6)  | 19.7(6)  | 2.0(5)   | 2.3(5)   | 0.4(5)   |
| C15  | 20.0(6)  | 16.8(6)  | 15.7(6)  | -1.1(5)  | 2.8(5)   | -1.1(5)  |
| C16  | 20.1(6)  | 21.3(6)  | 19.1(6)  | 2.2(5)   | 2.5(5)   | 1.6(5)   |
| C17  | 17.2(6)  | 20.8(6)  | 22.3(6)  | -0.1(5)  | 4.8(5)   | 0.9(5)   |

**Table 4 Bond Lengths for x1402007.**

| <b>Atom</b> | <b>Atom</b> | <b>Length/Å</b> | <b>Atom</b> | <b>Atom</b> | <b>Length/Å</b> |
|-------------|-------------|-----------------|-------------|-------------|-----------------|
| O1          | C1          | 1.4274(16)      | C6          | C7          | 1.3832(17)      |
| O1          | C2          | 1.3710(15)      | C8          | C11         | 1.5320(16)      |
| O2          | O3          | 1.4788(11)      | C8          | C13         | 1.5666(16)      |
| O2          | C8          | 1.4668(13)      | C9          | C10         | 1.5381(17)      |
| O3          | C9          | 1.4497(14)      | C9          | C16         | 1.5267(17)      |
| C2          | C3          | 1.3883(18)      | C9          | C17         | 1.5246(17)      |
| C2          | C7          | 1.3969(17)      | C10         | C11         | 1.5311(17)      |
| C3          | C4          | 1.3906(18)      | C10         | C12         | 1.5515(16)      |
| C4          | C5          | 1.3930(17)      | C12         | C13         | 1.5604(16)      |
| C5          | C6          | 1.4046(17)      | C13         | C14         | 1.5356(16)      |
| C5          | C8          | 1.5083(17)      | C13         | C15         | 1.5310(16)      |

**Table 5 Bond Angles for x1402007.**

| <b>Atom</b> | <b>Atom</b> | <b>Atom</b> | <b>Angle/°</b> | <b>Atom</b> | <b>Atom</b> | <b>Atom</b> | <b>Angle/°</b> |
|-------------|-------------|-------------|----------------|-------------|-------------|-------------|----------------|
| C2          | O1          | C1          | 116.79(10)     | C11         | C8          | C13         | 102.36(9)      |
| C8          | O2          | O3          | 110.96(8)      | O3          | C9          | C10         | 106.67(9)      |
| C9          | O3          | O2          | 109.30(8)      | O3          | C9          | C16         | 110.18(10)     |
| O1          | C2          | C3          | 124.66(11)     | O3          | C9          | C17         | 103.21(9)      |
| O1          | C2          | C7          | 115.79(11)     | C16         | C9          | C10         | 114.40(10)     |
| C3          | C2          | C7          | 119.55(12)     | C17         | C9          | C10         | 112.64(10)     |
| C2          | C3          | C4          | 119.60(11)     | C17         | C9          | C16         | 109.12(10)     |
| C3          | C4          | C5          | 121.88(12)     | C9          | C10         | C12         | 111.35(10)     |
| C4          | C5          | C6          | 117.63(12)     | C11         | C10         | C9          | 109.77(10)     |
| C4          | C5          | C8          | 121.23(11)     | C11         | C10         | C12         | 100.85(9)      |
| C6          | C5          | C8          | 121.13(11)     | C10         | C11         | C8          | 99.92(9)       |
| C7          | C6          | C5          | 121.03(11)     | C10         | C12         | C13         | 106.69(9)      |
| C6          | C7          | C2          | 120.31(11)     | C12         | C13         | C8          | 102.48(9)      |
| O2          | C8          | C5          | 102.39(9)      | C14         | C13         | C8          | 109.31(10)     |
| O2          | C8          | C11         | 107.10(9)      | C14         | C13         | C12         | 109.93(10)     |
| O2          | C8          | C13         | 112.29(9)      | C15         | C13         | C8          | 114.08(10)     |
| C5          | C8          | C11         | 116.33(10)     | C15         | C13         | C12         | 113.19(10)     |
| C5          | C8          | C13         | 116.35(10)     | C15         | C13         | C14         | 107.76(10)     |

**Table 6 Torsion Angles for x1402007.**

| A  | B  | C   | D   | Angle/°    | A   | B   | C   | D   | Angle/°     |
|----|----|-----|-----|------------|-----|-----|-----|-----|-------------|
| O1 | C2 | C3  | C4  | 179.72(11) | C5  | C8  | C11 | C10 | -178.65(9)  |
| O1 | C2 | C7  | C6  | 179.60(11) | C5  | C8  | C13 | C12 | 159.27(10)  |
| O2 | O3 | C9  | C10 | -57.77(11) | C5  | C8  | C13 | C14 | 42.69(13)   |
| O2 | O3 | C9  | C16 | 66.95(11)  | C5  | C8  | C13 | C15 | -78.00(13)  |
| O2 | O3 | C9  | C17 | -176.65(8) | C6  | C5  | C8  | O2  | -41.40(13)  |
| O2 | C8 | C11 | C10 | 67.60(11)  | C6  | C5  | C8  | C11 | -157.80(11) |
| O2 | C8 | C13 | C12 | -83.23(11) | C6  | C5  | C8  | C13 | 81.43(13)   |
| O2 | C8 | C13 | C14 | 160.19(9)  | C7  | C2  | C3  | C4  | -0.17(18)   |
| O2 | C8 | C13 | C15 | 39.49(14)  | C8  | O2  | O3  | C9  | 61.55(10)   |
| O3 | O2 | C8  | C5  | 169.76(8)  | C8  | C5  | C6  | C7  | -179.16(11) |
| O3 | O2 | C8  | C11 | -67.37(11) | C9  | C10 | C11 | C8  | -68.43(11)  |
| O3 | O2 | C8  | C13 | 44.23(11)  | C9  | C10 | C12 | C13 | 86.59(12)   |
| O3 | C9 | C10 | C11 | 65.88(12)  | C10 | C12 | C13 | C8  | -0.80(11)   |
| O3 | C9 | C10 | C12 | -44.93(13) | C10 | C12 | C13 | C14 | 115.34(10)  |
| C1 | O1 | C2  | C3  | -0.08(18)  | C10 | C12 | C13 | C15 | -124.12(11) |
| C1 | O1 | C2  | C7  | 179.81(11) | C11 | C8  | C13 | C12 | 31.30(11)   |
| C2 | C3 | C4  | C5  | 0.81(19)   | C11 | C8  | C13 | C14 | -85.28(11)  |
| C3 | C2 | C7  | C6  | -0.50(18)  | C11 | C8  | C13 | C15 | 154.02(10)  |
| C3 | C4 | C5  | C6  | -0.76(18)  | C11 | C10 | C12 | C13 | -29.82(11)  |
| C3 | C4 | C5  | C8  | 178.48(11) | C12 | C10 | C11 | C8  | 49.14(10)   |
| C4 | C5 | C6  | C7  | 0.08(17)   | C13 | C8  | C11 | C10 | -50.67(10)  |
| C4 | C5 | C8  | O2  | 139.39(11) | C16 | C9  | C10 | C11 | -56.20(13)  |
| C4 | C5 | C8  | C11 | 22.99(16)  | C16 | C9  | C10 | C12 | -167.01(10) |
| C4 | C5 | C8  | C13 | -97.79(13) | C17 | C9  | C10 | C11 | 178.42(10)  |
| C5 | C6 | C7  | C2  | 0.54(18)   | C17 | C9  | C10 | C12 | 67.60(13)   |



**Table 7 Hydrogen Atom Coordinates ( $\text{\AA}\times 10^4$ ) and Isotropic Displacement Parameters ( $\text{\AA}^2\times 10^3$ ) for x1402007.**

| Atom | <i>x</i> | <i>y</i> | <i>z</i> | U(eq) |
|------|----------|----------|----------|-------|
| H1A  | 2860     | 12177    | 6937     | 42    |
| H1B  | 3480     | 10969    | 7568     | 42    |
| H1C  | 2081     | 10634    | 7292     | 42    |
| H3   | 4914     | 11842    | 7049     | 23    |
| H4   | 6724     | 11458    | 6744     | 22    |
| H6   | 5646     | 5419     | 5957     | 20    |
| H7   | 3853     | 5754     | 6277     | 21    |
| H10  | 10261    | 10011    | 6209     | 19    |
| H11A | 8419     | 11251    | 6439     | 18    |
| H11B | 8830     | 9127     | 6894     | 18    |
| H12A | 9141     | 8373     | 5144     | 20    |
| H12B | 8955     | 10985    | 5305     | 20    |
| H14A | 5933     | 10794    | 5272     | 27    |
| H14B | 6836     | 11656    | 4864     | 27    |
| H14C | 7082     | 12257    | 5581     | 27    |
| H15A | 7444     | 5754     | 5010     | 26    |
| H15B | 6923     | 7717     | 4531     | 26    |
| H15C | 6143     | 6775     | 4992     | 26    |
| H16A | 9696     | 6088     | 7102     | 31    |
| H16B | 11029    | 6788     | 7066     | 31    |
| H16C | 10576    | 4246     | 6913     | 31    |
| H17A | 10938    | 4096     | 5888     | 30    |
| H17B | 11587    | 6504     | 6013     | 30    |
| H17C | 10545    | 6136     | 5414     | 30    |

## Experimental

Single crystals of  $C_{17}H_{24}O_3$  [x1402007] were [1]. A suitable crystal was selected and [1] on a 'Bruker APEX-II CCD' diffractometer. The crystal was kept at 100 K during data collection. Using Olex2 [1], the structure was solved with the olex2.solve [2] structure solution program using Charge Flipping and refined with the ShelXL [3] refinement package using Least Squares minimisation.

1. Dolomanov, O.V., Bourhis, L.J., Gildea, R.J., Howard, J.A.K. & Puschmann, H. (2009), J. Appl. Cryst. 42, 339-341.
2. Bourhis, L.J., Dolomanov, O.V., Gildea, R.J., Howard, J.A.K., Puschmann, H. (2013). in preparation
3. Sheldrick, G.M. (2008). Acta Cryst. A64, 112-122

## Crystal structure determination of [x1402007]

**Crystal Data** for  $C_{17}H_{24}O_3$  ( $M=276.36$ ): monoclinic, space group  $P2_1/c$  (no. 14),  $a = 11.4559(2)$  Å,  $b = 5.90270(10)$  Å,  $c = 22.2867(4)$  Å,  $\beta = 102.5127(10)^\circ$ ,  $V = 1471.25(4)$  Å<sup>3</sup>,  $Z = 4$ ,  $T = 100$  K,  $\mu(\text{CuK}\alpha) = 0.668$  mm<sup>-1</sup>,  $D_{\text{calc}} = 1.248$  g/mm<sup>3</sup>, 15784 reflections measured ( $7.904 \leq 2\theta \leq 140.106$ ), 2786 unique ( $R_{\text{int}} = 0.0285$ ,  $R_{\text{sigma}} = 0.0191$ ) which were used in all calculations. The final  $R_1$  was 0.0351 ( $I > 2\sigma(I)$ ) and  $wR_2$  was 0.0891 (all data).

## Refinement model description

Number of restraints - 0, number of constraints - unknown.

### Details:

1. Fixed Uiso  
At 1.2 times of:  
All C(H) groups, All C(H,H) groups  
At 1.5 times of:  
All C(H,H,H) groups
- 2.a Ternary CH refined with riding coordinates:  
C10 (H10)
- 2.b Secondary CH2 refined with riding coordinates:  
C11 (H11A,H11B), C12 (H12A,H12B)
- 2.c Aromatic/amide H refined with riding coordinates:  
C3 (H3), C4 (H4), C6 (H6), C7 (H7)
- 2.d Idealised Me refined as rotating group:  
C1 (H1A,H1B,H1C), C14 (H14A,H14B,H14C), C15 (H15A,H15B,H15C), C16 (H16A,H16B,H16C), C17 (H17A,H17B,H17C)

This report has been created with Olex2, compiled on 2013.12.10 svn.r2850 for OlexSys. Please [let us know](#) if there are any errors or if you would like to have additional features.
